# Supplementary material
Source: PubMed Central journal article supplement (PMC5319906)
Supplement: NIHMS831201-supplement.pdf [file NIHMS831201-supplement.pdf]

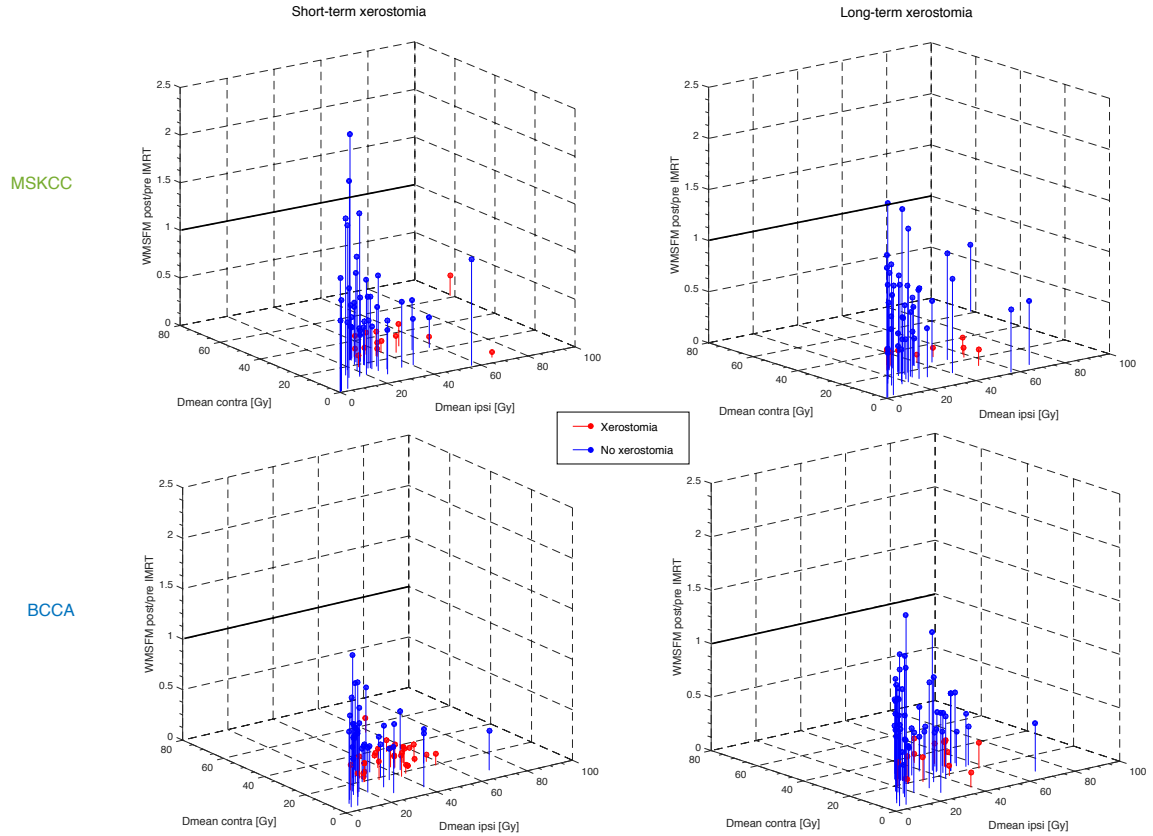

**Figure S1.** A three-dimensional scatter plot of WMSFM post/pre IMRT (z-axis),  $D_{\text{mean}_{\text{contra}}}$  (y-axis), and  $D_{\text{mean}_{\text{ipsi}}}$  (x-axis) for short- (left) and long-term (right) xerostomia (red) in the *MSKCC* (upper) and the *BCCA* (lower) cohort. Note: Patients without xerostomia are denoted in blue, and patients with  $WMSFM_{\text{post/pre IMRT}} > 1.0$  are located above the solid z-axis line.

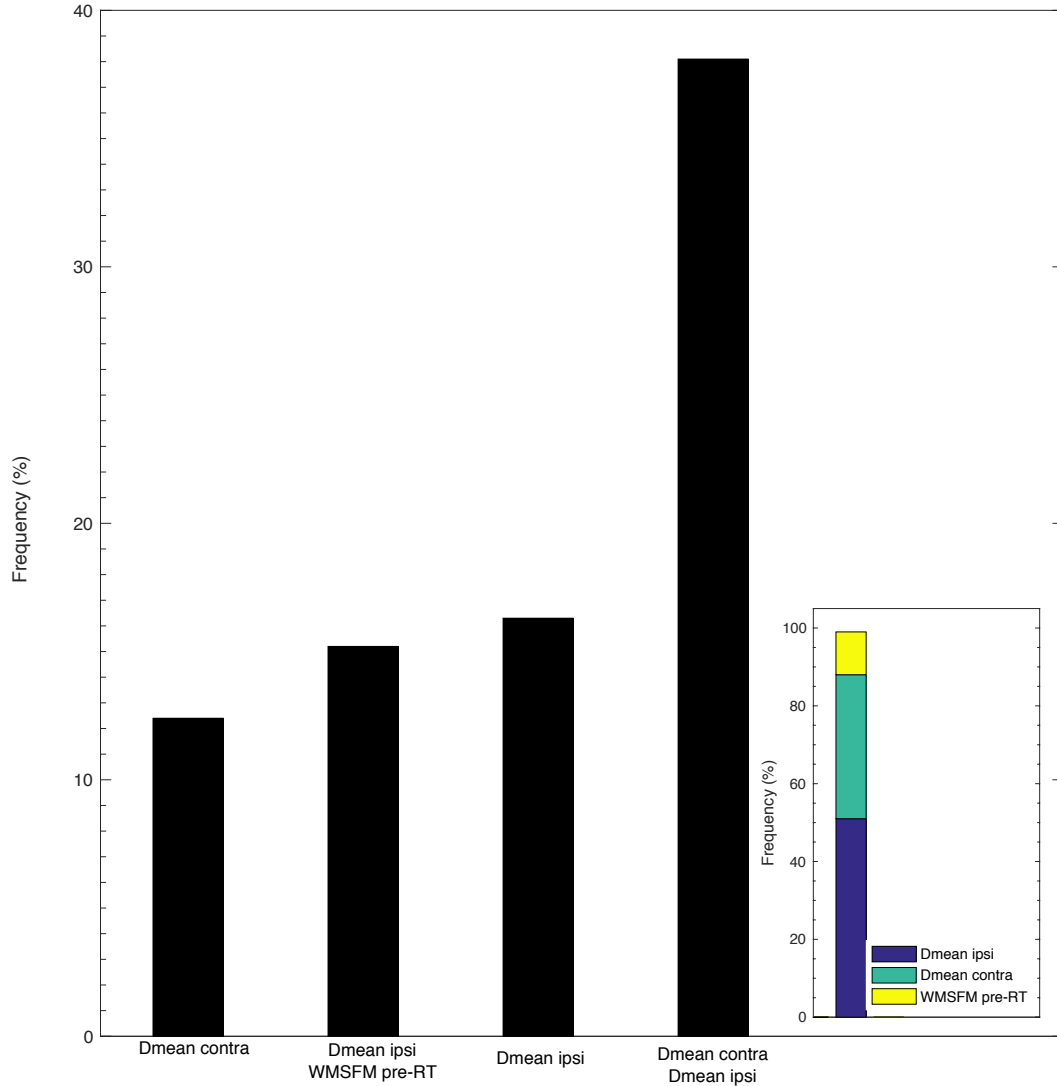

**Figure S2.** The frequency of the four most selected MVA models (selected in  $\geq 10\%$  *i.e.* in at least 100 of the 1000 possible models) for short-term xerostomia in the *MSKCC* cohort (left), and the relative contribution of each individual variable across the four MVA models (inserted to the right).

**Table S1.** Comparison of available patient characteristics between the *MSKCC* and the *BCCA* cohort. Note: The *p*-values come from a Mann-Whitney *U* test, and significance is denoted with \*.

|                                    | <b>BCCA</b>           |  | <b>MSKCC</b>        |  | <i>p</i>        |
|------------------------------------|-----------------------|--|---------------------|--|-----------------|
|                                    | Follow-up: Short/Long |  | Follow-up: Short    |  |                 |
|                                    | n=66                  |  | n=55                |  | n=53            |
|                                    | <i>Mean±SD</i>        |  | <i>Mean±SD</i>      |  | <i>p</i>        |
|                                    | <i>Mean±SD</i>        |  | <i>Mean±SD</i>      |  | <i>p</i>        |
| <b>Age</b>                         | 56±13                 |  | 56±10               |  | 0.77            |
| <b>Dmean<sub>contra</sub> [Gy]</b> | 21.8±9.0              |  | 18.3±10.2           |  | 0.03*           |
| <b>Dmean<sub>ipsi</sub> [Gy]</b>   | 34.3±14.7             |  | 30.7±17.0           |  | 0.12            |
| <b>WMSFM pre-RT [g/5 min]</b>      | 8.6±4.1               |  | 2.8±1.3             |  | <0.0001*        |
| <b>ΔWMSFM</b>                      | 0.34±0.30/0.54±0.35   |  | 0.61±0.51           |  | 0.001*          |
|                                    | <b><i>N (%)</i></b>   |  | <b><i>N (%)</i></b> |  | <b><i>p</i></b> |
| <b>Chemotherapy</b>                | 34 (52)               |  | 38 (69)             |  | 0.007*          |
| <b>Gender</b>                      |                       |  |                     |  | 0.10            |
| <i>Female</i>                      | 22 (33)               |  | 11 (20)             |  | 0.02*           |
| <i>Male</i>                        | 44 (67)               |  | 44 (80)             |  |                 |
| <b>Surgery</b>                     | 10 (15)               |  | 14 (25)             |  | 0.09            |
| <b>Tumor Site</b>                  |                       |  |                     |  | 0.77            |
| <i>Base of tongue</i>              | 11 (17)               |  | 9 (16)              |  | 0.90            |
| <i>Buccal mucosa</i>               | -                     |  | 2 (4)               |  |                 |
| <i>Floor of mouth</i>              | -                     |  | 1 (2)               |  |                 |
| <i>Glottic</i>                     | -                     |  | 4 (7)               |  |                 |
| <i>Hypopharynx</i>                 | 1 (2)                 |  | -                   |  |                 |
| <i>Larynx</i>                      | -                     |  | 2 (4)               |  |                 |
| <i>Max sinus</i>                   | -                     |  | 1 (2)               |  |                 |
| <i>Nasal cavity</i>                | 2 (3)                 |  | 1 (2)               |  |                 |
| <i>Nasopharynx</i>                 | 25 (38)               |  | 8 (15)              |  |                 |
| <i>Oral cavity</i>                 | 2 (3)                 |  | -                   |  |                 |
| <i>Oral tongue</i>                 | -                     |  | 7 (13)              |  |                 |
| <i>Oropharynx</i>                  | 1 (2)                 |  | -                   |  |                 |
| <i>Parotid</i>                     | 1 (2)                 |  | 2 (4)               |  |                 |
| <i>Submandibular gland</i>         | -                     |  | 1 (2)               |  |                 |
| <i>Retromolar trigone</i>          | -                     |  | 1 (2)               |  |                 |
| <i>Thyroid</i>                     | 2 (3)                 |  | 1 (2)               |  |                 |
| <i>Tonsil</i>                      | 11 (17)               |  | 12 (22)             |  |                 |
| <i>Unkown primary</i>              | 10 (15)               |  | 3 (5)               |  |                 |

**Table S2.** Re-fitted univariate and multivariate logistic regression results based on the candidate predictors in the *BCCA* cohort and as applied to this cohort.

| <b>BCCA</b>                                       |             |                      |                |           |                       |                        |             |                      |             |          |                       |
|---------------------------------------------------|-------------|----------------------|----------------|-----------|-----------------------|------------------------|-------------|----------------------|-------------|----------|-----------------------|
| <b>Follow-up: Short</b>                           |             |                      |                |           |                       | <b>Follow-up: Long</b> |             |                      |             |          |                       |
| <i>Model</i>                                      | <i>AUC</i>  | <i>R<sub>s</sub></i> | <i>p</i>       | <i>β</i>  | <i>p<sub>HL</sub></i> | <i>Model</i>           | <i>AUC</i>  | <i>R<sub>s</sub></i> | <i>p</i>    | <i>β</i> | <i>p<sub>HL</sub></i> |
| Dmean <sub>contra</sub> *                         | 0.71 (0.06) | 0.40 (0.08)          | 0.01 (0.02)    | 0.14      | 0.16 (0.06)           |                        |             |                      |             |          |                       |
| Dmean <sub>ipsi</sub> *                           | 0.80 (0.06) | 0.53 (0.11)          | 0.002 (0.01)   | 0.09      | 0.21 (0.10)           | Dmean <sub>ipsi</sub>  | 0.69 (0.07) | 0.25 (0.11)          | 0.13 (0.18) | 0.05     | 0.42 (0.09)           |
| Dmean <sub>contra</sub> +Dmean <sub>ipsi</sub> ** | 0.81 (0.05) | 0.55 (0.09)          | 0.0002 (0.001) | 0.08/0.07 | 0.27 (0.15)           |                        |             |                      |             |          |                       |

\*Qualified for MVA, \*\*Most frequently selected model (65%).
